# Supplementary material for: Assessing the effect of lithological setting, block characteristic and slope topography on the runout length of rockfalls in the Alps and on the La Réunion island
Source: Copernicus journal article supplement (doi:10.5194/nhess-2020-322), 2020-10-06
Supplement: Supplementary file [file nhess-2020-322-AC2-supplement.pdf]

## **Response to reviewer comments on “Assessing the effect of lithological setting, block characteristic and slope topography on the runout length of rockfalls in the Alps and on the La Réunion island”**

**Kerstin Wegner, Florian Haas, Tobias Heckmann, Anne Mangeney, Virginie Durand, Nicolas Villeneuve, Philippe Kowalski, Aline Peltier, Michael Becht**

**nhess-2020-322**

### **Response to Anonymous Referee #2 (RC2)**

We thank the anonymous referee #2 (RC2) for the constructive comments and detailed feedback. We greatly appreciate the suggested revisions which will improve the quality of our revised manuscript. In the following the original comments of the reviewer #2 are listed point-by-point in blue and replied to in black.

The presented manuscript deals with the four analysed talus slopes and a thorough mapping of lithological characteristics, being deposited rock shapes and sizes and its influence on runout length. The manuscript presents itself thoroughly written and elaborated. The presented data is of very good quality and meticulously analysed. The findings corroborate a complex interaction between analysed parameters such as rock shape, sphericity, slope characteristics, above all surface roughness. The authors aim to contrast the findings in previous work, which is highly favourable. As the findings are complex to trim into existing results, they fail to a certain extent to present the new aspects in a consistent way.

### **Main concerns**

Review Comment 1:

1) Rockfall source and site consistency: The reasoning for the selection of the presented sites was not argued for. The impression, that those were randomly chosen sites due to logistic reason rather than careful scientific screening is imminent. The authors state, that “For the two study sites PF and ZBT the blocks cannot be assigned to one single rockfall. Whereas the blocks of the other two study sites GA and DTS can be assigned to a rockfall event”. This is a key difference between the sites as the processes are significantly different. Single block fall as opposed to block fall with fragmentation as opposed to rock avalanches – here we would need to differentiate within the volume classes again – are governed by different kinematic behaviour. The authors are strongly urged to focus on these differences between their sites and comparing it to respective previous literature. Was gravitational sorting only seen on “single rockfall” talus slopes? Is the data quality good enough to argue for or against it?

Reply: We take the reviewer's comment very seriously. The study areas have in fact not been selected systematically. Rather than deliberately selecting areas with lithological or climatic differences in mind, we are pursuing a synthesis of various existing data with a very high quality. Even though we have study areas with different process activity, we do not want to separate the manuscript into two parts. One of our main goals was to focus on the different lithological conditions of the study sites, which are conspicuous. On the other hand, we fully acknowledge that the sites represent different processes such as rock topples (Gampenalm) and block fall. Rock avalanches (the other end member named by the reviewer), however, have definitely not taken place at our study sites. The particles that we analysed either represent single block falls or belong to a single event where a larger

rock mass detached from the rock face and probably further disintegrated during descent. As this point of criticism was also noted by the other reviewers, we intend to work out this difference in a more focused and structured way when revising the manuscript. We do think that we can make statements about gravitational sorting because of the high quality of the data. Moreover, we also found that parameters other than the block size influence the runout distances of the blocks.

Review Comment 2:

2) Key finding: Although it is highly appreciated to publish work not in line with previous findings, the discrepancies, differences, etc. are to be highlighted in a more consistent manner. Purely publishing a scientific “it’s complicated” is insufficient. The impression is that they applied plotting schemes and analysis methodologies found in previous literature in order to make comparison easier. This is certainly done with good intentions, but the meandering presentation of the results is suboptimal.

Reply: For the revision, we will aim to organize the structure of the manuscript more stringently. This will be done especially in relation to the different process types that occur at the study sites. Accordingly, we will revise and restructure the introduction, the current state of research, the description of the study sites, the results and figures and the conclusion. Following the suggestion of the reviewer in the subsequent comment, we will better and more rigorously consider roughness as an additional factor that “complicates” particle runout.

Review Comment 3:

3) Link to surface roughness: The authors possess excessive data sets and high resolution DEM in particular. The publication quality would gain significance and make use of the available data set if sections 4.1 and 4.2 would be linked in a meaningful way. The link between surface roughness and block size/shape and runout length is a key factor in talus slopes. The naïve understanding of a rockfall propagating on a talus slope is, that as long as the roughness dimension, i.e. lying boulders, etc. is smaller than the travelling block axis length, the breaking effect is rather small. This data set would provide a perfect investigation basis for those dependencies. Runout length vs. surface roughness, coupled with different shape classes, different masses. Rather than presenting a plain characteristics of the talus slopes as in Fig. 5, the extracted correlations - if there are any – would be of interest for the NHSS community. In this line, the presentation of the analyses, in particular Figure 5 and 7 should be revised.

Reply: Thank you for this comment and the advice. We have planned the following additional and more rigorous analysis for the revision of the manuscript in order to be able to assess the influence and the dependence of the roughness of the slope on the deposited blocks: We will get the most out of the original high-resolution TLS point cloud data to quantify surface roughness along the hillslope profile (from the rockwall down to the footslope of the talus) with two points in mind: First, roughness is expected to reflect the granulometry of the substrate at grain sizes smaller than the single blocks we measured. This parameter could yield more information regarding gravitational sorting patterns where it indicates a coarsening towards the footslope and/or a concentration of coarse material at the foot of the rockwall. We want to do this by using roughness as a proxy for grain size. This is to determine and analyze the sorting of particle sizes beyond the measured block sizes for the single debris cones. Second, especially for small blocks, their size relative to the surface roughness could be an additional factor influencing their runout length. For this purpose, the roughness along the calculated runout paths of each individual

block are to be determined in order to be able to analyze the influence of roughness on runout distance and how this interacts with the different block sizes. Accordingly, Figures 5 and 7 will be revised or replaced by others.

Generally, the presented manuscript might merit publication if the main concerns are addressed and presented in a consistent analysis. Contrasting results are desirable as they lead to a discussion in the community but a sound reasoning is a pre-requisite.

In the following there are some minor/technical/content corrections with might become obsolete after major revisions:

Review Comment 4:

General comment on the use of parentheses: Clearly a matter of writing style, however, IMHO the excessive use of parentheses hinders the reading flow. Personal guidance is: if it's important, rephrase it into the written sentences, if it does not merit being included in the text, remove it. The authors might check their use of parentheses with this in mind, or discard it as the referee's spleen. Does not hold for introduction of acronyms, of course.

Reply: We agree with the reviewer and we will review the manuscript and check the relevant sentences. In the according sentences where parentheses can be omitted, we will delete them or rephrase a new sentence.

Review Comment 5:

Figure font sizes: Revise the font size and general sizing of heavily loaded figures.

Reply: We will revise the figures.

## **Abstract**

Review Comment 6 – 115:

is explanation of LiDAR in abstract necessary?

Reply: As LiDAR is a common technical term and as this is also specified in the NHES English guidelines and house standards, we follow the reviewer's comment, delete the explanation and refer to it in the text at the first naming.

Review Comment 7 – 119:

no parantheses – if necessary, add it to text “. . . and longitudinal profile curves”

Reply: We will rephrase this sentence.

Review Comment 8 – 119-20:

Start concluding sentences with what could be confirmed.

Reply: We will rephrase the sentence so that we start it with our determination.

Review Comment 9 – 123,23:

no acronyms in abstract.

Reply: We will delete the acronyms in the abstract and explain it at the first occurrence in the text.

## 1. Introduction

Review Comment 10 – 130:

can be deposited on storage landforms such as talus slopes. If playing the devil's advocate one could argue that all rockfalls, which have space to be deposited on a storage landform are from a natural hazard's perspective irrelevant, as they do not threaten any infrastructure.

Reply: We agree that not every rockfall event endangers human lives and infrastructure facilities. But nevertheless, research in areas where no infrastructure is involved also plays an important role in terms of the transferability of results. Moreover, the runout and deposition of rockfall is also a geomorphological interesting problem. We will rephrase the sentences and put them into perspective.

Review Comment 11 – 131ff:

Although citing relevant articles is a form of contemplating on previous work and arranging the presented work in the current state of the art research, citing it after a common senses statement like “ a falling rock is dangerous” should be omitted. Rather cite something specific, if at all necessary to include in such a general introduction.

Reply: In the revised manuscript we will rephrase the addressed text passages.

Review Comment 12 – 139:

probably “global climate change”, but is it really? Isn't just the development pressure by increasing land use and a diminishing risk tolerance in societies in general the leading factors why natural hazards have to be mapped ever more accurately? And of course because the technical means improve constantly. . .

Reply: We agree that spatial densification and corresponding infrastructure increase the problem of dealing with natural hazards. When we revise the introduction, we will structure it more in line with our analysis.

Review Comment 13 – 153:

“conditions of the talus cone” → soil characteristics in general. The presented study focuses on runout on talus cones, but rockfall runout happens on more terrains than talus.

Reply: We agree that rockfall runout can take place on other storage landforms than talus cones as well. We will rephrase this sentence and write "topographic conditions".

Review Comment 14 – 155:

runout trajectory is predominantly governed by the impact conditions, geometrical boundary conditions and soil-rock interaction. Thus, the moment of inertia plays a role on the specific kinematical properties – meaning how fast can a rock spin, how reactive is a rock to slope ruggedness, etc - but ultimately does not alter significantly as a single leading factor the runout trajectory.

Reply: We will check the parameters mentioned in the literature and will revise and improve the sentences according to the section. We will describe the influencing parameters regarding the runout length of blocks in more detail.

Review Comment 15 – 170:

Introduce the test sites with names and acronyms here.

Reply: We will follow the reviewer's suggestion.

## 2. Study Sites

Review Comment 16 – 185:

Figure 1: Are there aerial maps available for all sites? Or photographs in the same aspect ratio? The accessibility of the image would improve if consistency with respect to aspect ratio, presentation style (aerial with indicated release and deposition area – or 1 photograph per site with a similar viewing angle).

Reply: We will try to create consistent figures of the study areas.

Review Comment 17 – 190:

Figure 2: Is a consistent presentation in one figure possible?

Reply: We will change the figures and present all four study sites in one common figure.

Review Comment 18 – 1100:

delete “show” or “indicate”

Reply: We will delete “show”.

Review Comment 19:

Table 1: totally aware, that formatting tables is a nightmare, but “centered” titles columns would improve readability.

Reply: We will centre the column headings in the revised manuscript.

Review Comment 20 – 1135:

x, y, z are variables – use italic font

Reply: We will follow the reviewer's comment and write the variables in italic font.

Review Comment 21 – 1137:

z is a variable, use italic font

Reply: We will follow the reviewer's comment and write the variable in italic font.

Review Comment 22 – 1139:

points/m<sup>2</sup> → pts/m<sup>2</sup> as used in the table.

Reply: We will follow the reviewer's comment and write “pts/m<sup>2</sup>” as shown in Table 3.

Review Comment 23:

Table 3: spaces in between the scan resolution values, referencing precision, use  $\cdot$  or similar for Number of points raw data set or 1.5e6 notation.

Reply: We will follow the comment. We will insert spaces in between the scan resolution and referencing precision values and use a uniform notation for the number of points raw data set.

## 3. Determination of block size, block shape and runout length

Review Comment 24 – 1144:

a,b and c are parameters use italic font

Reply: We will follow the comment and write the variables in italic font.

Review Comment 25 – 1146:

every block with  $c > 0.5$  m? Shortest axis large than 0.5 m?

Reply: The "c." does not refer to the c axis but is the abbreviation of "circa". We have measured those blocks in the coloured point cloud that have a longest axis longer than  $\sim 0.5$  m. We will remove the parentheses here and rephrase the sentence.

Review Comment 26 – 1150:

Figure 3: I basically see a cuboid. If you really want to show how the bounding box of a given rock is defined, show a bounding box with labels around a rock. Wasting a figure to print a cuboid is a bit questionable. The NHES reader should be able to imagine a bounding box around a rock though.

Reply: We will revise Figure 3. We will represent the axes either by a block from the point cloud or by a photograph. We are considering whether this representation could be integrated into the rearranged Figures of the study sites.

Review Comment 27 – 1163:

normalization of runout: is the interval  $[0,1]$  defined as minimal, maximal runout or is it 0 = no runout meaning stopping in release area (which probably is not possible) and 1 is maximal measured runout?

Reply: Our purpose was to enable the comparability of the runout length of all study sites since they differ greatly in length. For this reason, we have normalized them. We have assumed that "0" stands for the detachment area or the area between the rock face and the slope and "1" for the maximum runout length of a block. Accordingly, no block is assigned the value "0". We will describe this point in the revised manuscript in more detail.

#### 4. Results and Discussion

Review Comment 28 – 1186:

In the plot c is the shortest axis.. Clarify? A criteria on the resolution boundary, i.e. the smallest axis would make more sense.

Reply: We have selected blocks whose longest axis measures at least 0.5 m. Please see our response to comment 25 1146.

Review Comment 29 – 1217:

Add labelling (1),(2), : : :, (6) in all subpanels.

Reply: In the revised manuscript we will provide subpanels 1-6 in Figure 5 for each study area for the statistical distribution of the blocks regarding their block volumes and shapes.

Review Comment 30:

Figure 6: Are the depicted areas only the talus fan? Could some surrounding be included and the talus extent be marked with a dashed line equivalently as in Fig. 1? Colour code and scale range make the talus slope look quite uniform. Could the range be shortened and thus differences in the main talus deposition become more obvious?

What is the slope inclination grid size base raster? Could the indications of steepness classes help the reader to classify the slopes visually more easily?

Reply: The slopes shown in Figure 6, represents only the area up to the talus toe. For the revision, we propose to add an analytical hillshade behind the maps and extend the area compared to the Figures 1 and 2. We derived the slope based on a grid with a resolution of 0.75 m. We agree with the reviewer that classes for the slope maps will improve the visualization to better show the differences between each slope. We will implement this in the revision.

Review Comment 31 – 1297ff:

Rockfall source apparently are two different processes: single block fall and rock avalanches. This fact changes the entire approach. Are differences due to this fact?

Reply: We fully acknowledge that the four sites represent different processes. On the one hand we have two study sites, Gampenalm and Dreitorspitze, where the deposits of the talus slope are characterized by one event, while on the other sites, La Réunion and Zwieselbach valley, the slopes are formed by “continuous” rockfall activity. Rock avalanches have not taken place at our study sites. We find differences in deposition of boulders on the talus slopes regarding the block size and shape. For Gampenalm and Dreitorspitze, the size of the blocks does not play a major role. Here, the block shape acts as a moderating parameter. For the study sites of La Réunion and Zwieselbach valley, the block size influences the deposition on the talus slope while we could not find any influence of block shape on the influence of deposition. As we take the comment very seriously, we will also focus on the influence of the different process types and take it up in a more structured way in the manuscript.

## 5. Conclusion

Review Comment 32 – 1357:

boulders with low axial ratios do also have a predominant rotation axis, as a perfect symmetric rock does not exist in nature. It rather has no large flat areas, hindering a re-acceleration after a landing on such a flat surface.

Reply: We agree with the reviewer that blocks with a lower axial ratio also have a rotation axis and that a symmetrical block does not exist in nature. However, we assume that flat and elongated blocks can also rotate. They can position themselves on their axis of rotation by moving downslope. In our analysis we come to the conclusion that for Gampenalm and Dreitorspitze blocks with a lower axial ratio achieve larger runout distances. In the case of Gampenalm, however, rounder blocks are deposited also in the upper part of the slope. In contrast, the parameter axial ratio does not play a role for the deposition of the study areas La Réunion and Zwieselbach valley.
